# Supplementary material for: The fabrication of Co:ZnS/CoS2heterostructure nanowires with a superior hydrogen evolution performance
Source: Royal Society of Chemistry journal article supplement (doi:10.1039/c9se00398c), 2019-01-01
Supplement: c9se00398c1.pdf [file c9se00398c1.pdf]

## Supplementary materials

### Fabrication of Co:ZnS/CoS<sub>2</sub> Heterostructure Nanowires with Superior Hydrogen Evolution Reaction Performance

Shancheng Yan<sup>†\*</sup>, Ka Wang<sup>†</sup>, Qingxia Wu<sup>†</sup>, Fei Zhou<sup>\*†</sup>, Zixia Lin<sup>§</sup>, Haizeng Song<sup>†</sup>, Yi Shi<sup>†\*</sup>

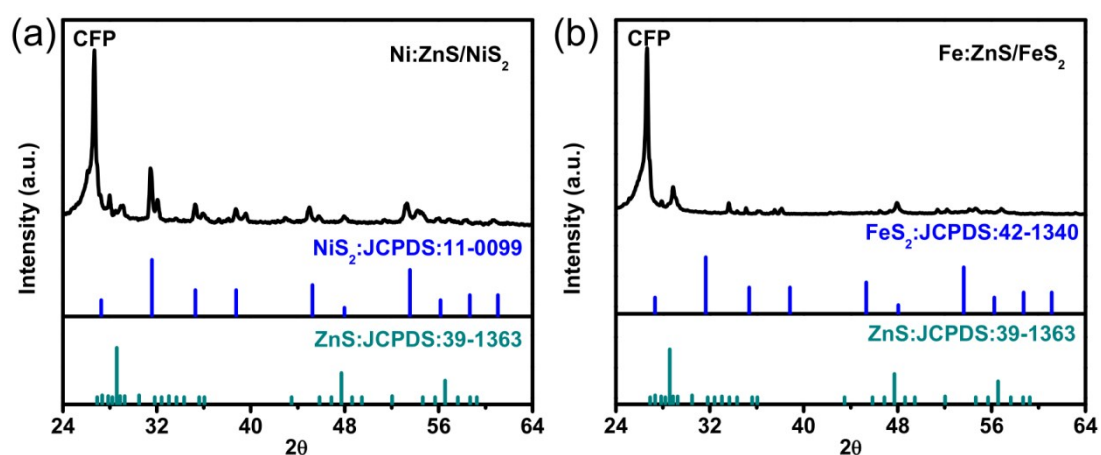

**Figure S1.** (a) XRD patterns of Ni:ZnS/NiS<sub>2</sub> (Ni:Zn=20%); (b) XRD patterns of Fe:ZnS/FeS<sub>2</sub> (Fe:Zn=20%).

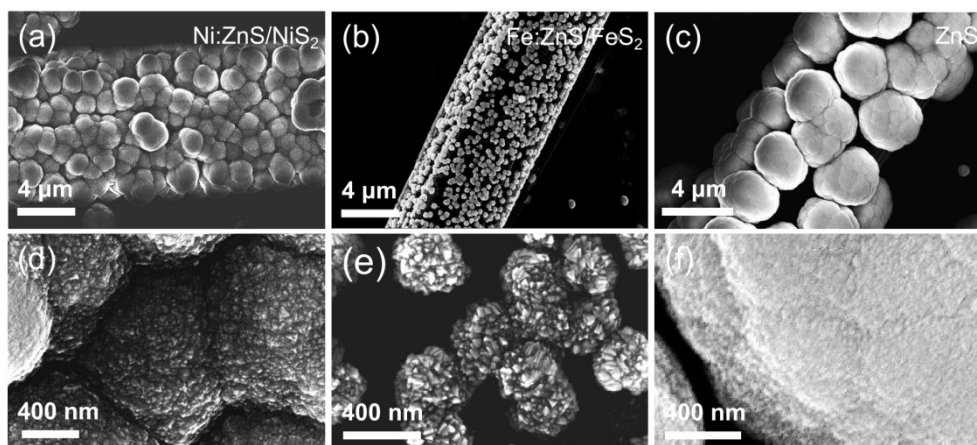

**Figure S2.** SEM images of (a) Ni:ZnS/NiS<sub>2</sub> (Ni:Zn=20%), (b) Fe:ZnS/FeS<sub>2</sub> (Fe:Zn=20%), and (c) ZnS; (d), (e), and (f) are corresponding high-resolution SEM images.

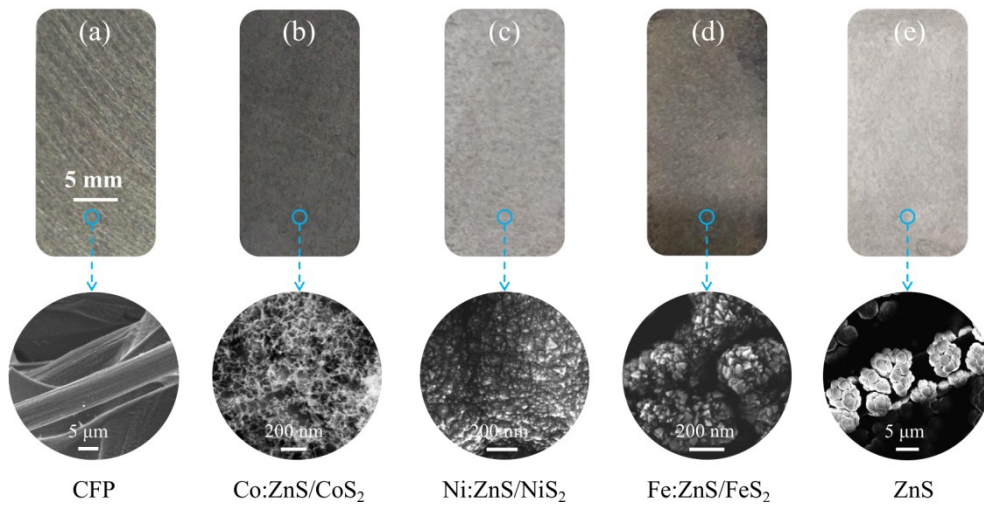

**Figure S3.** Photograph of (a)-(e) CFP, Co:ZnS/CoS<sub>2</sub> (Co:Zn=20%), Ni:ZnS/NiS<sub>2</sub> (Ni:Zn=20%), Fe:ZnS/FeS<sub>2</sub> (Fe:Zn=20%), and ZnS and their corresponding SEM images.

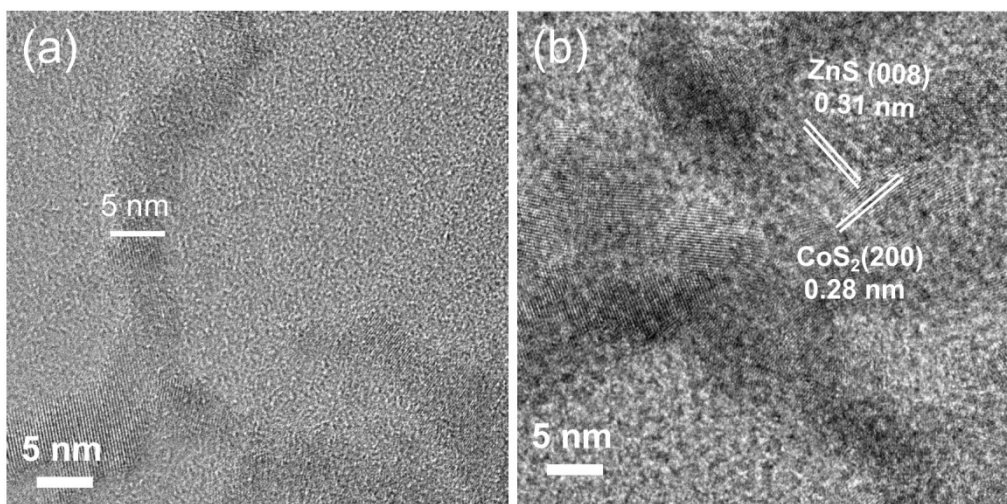

**Figure S4.** (a) and (b) HRTEM image of Co:ZnS/CoS<sub>2</sub> (Co:Zn=20%) heterostructures nanowires.

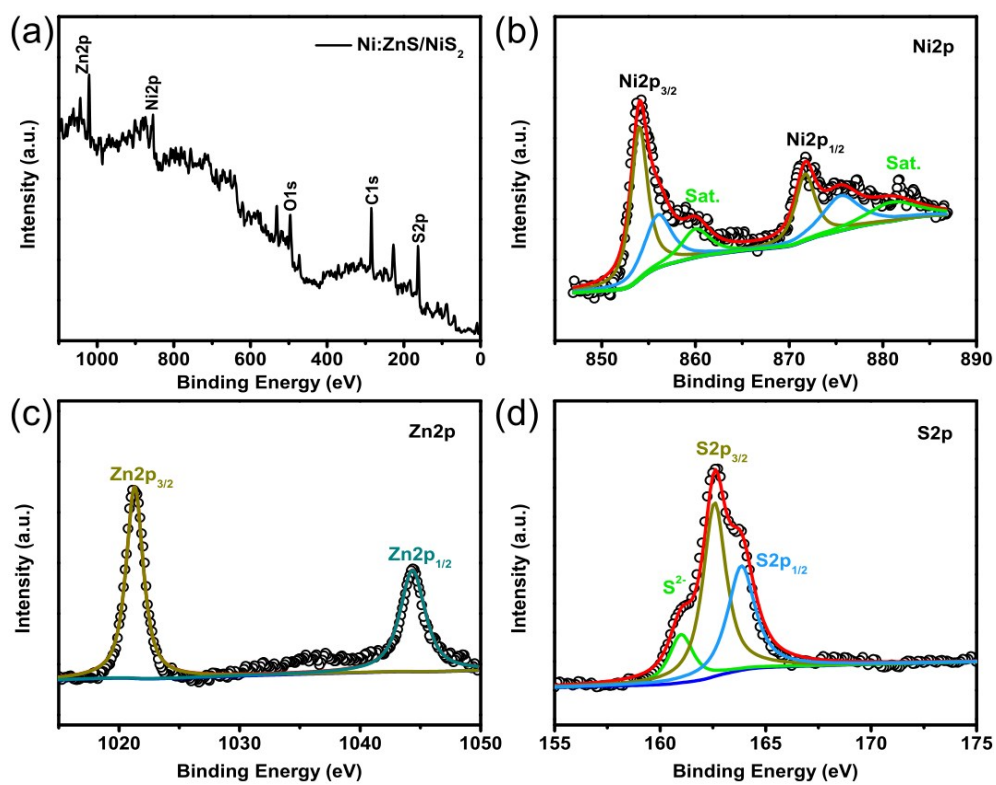

**Figure S5.** (a) XPS survey spectrum of Ni:ZnS/NiS<sub>2</sub> (Ni:Zn=20%); XPS spectra of the Ni:ZnS/NiS<sub>2</sub> (Ni:Zn=20%) from (b) Ni 2p, (c) Zn 2p, (d) S 2p.

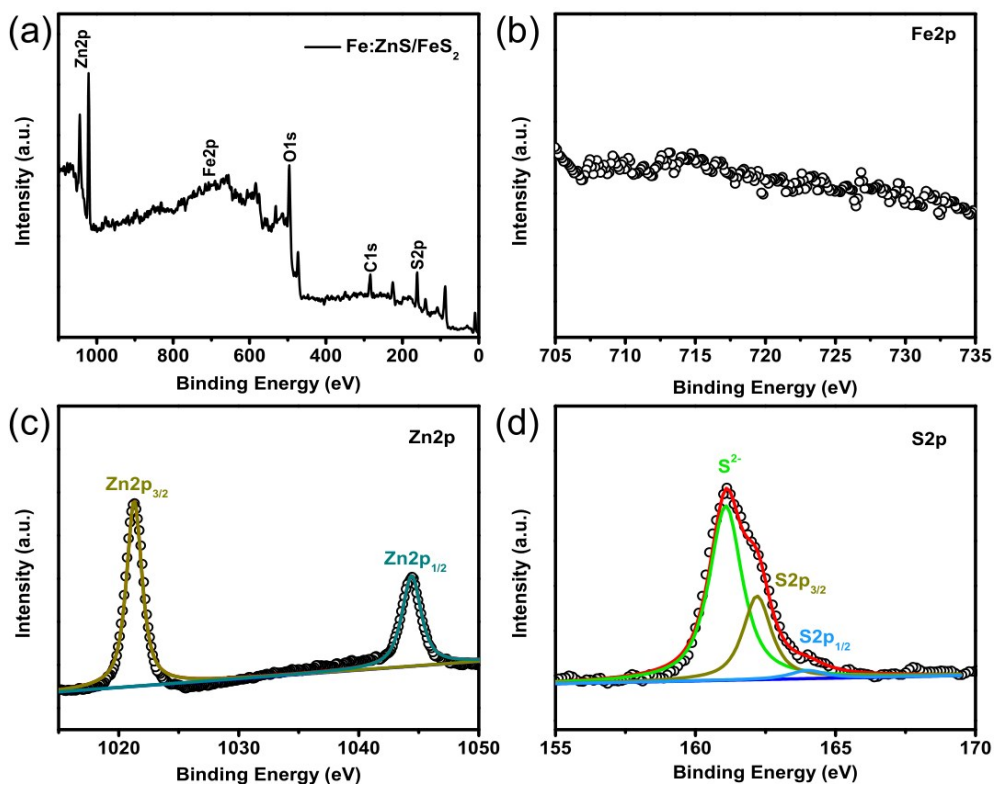

**Figure S6.** (a) XPS survey spectrum of Fe:ZnS/FeS<sub>2</sub> (Fe:Zn=20%); XPS spectra of the Fe:ZnS/FeS<sub>2</sub> (Fe:Zn=20%) from (b) Fe 2p, (c) Zn 2p, (d) S 2p.

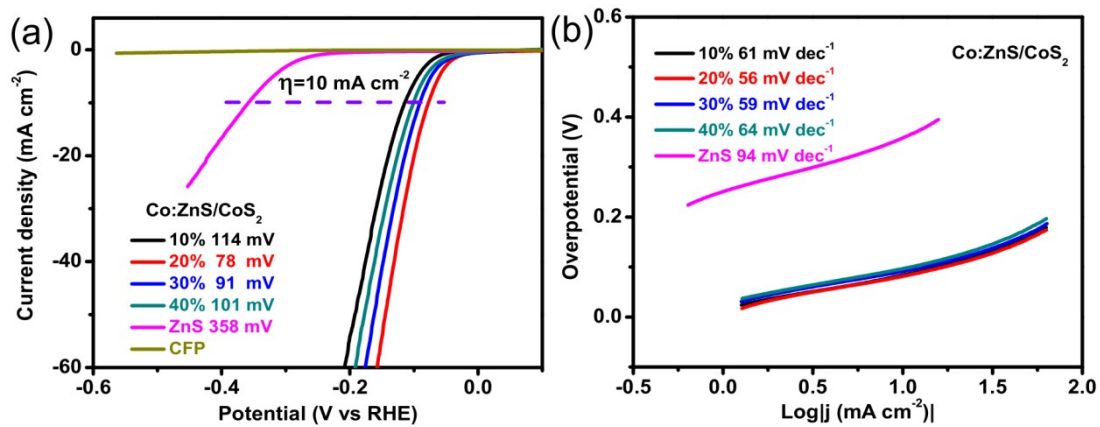

**Figure S7.** (a) LSV curves of ZnS and Co:ZnS/CoS<sub>2</sub> heterostructure nanowires with different cobalt ratios (Co:Zn=10%, 20%, 30%, 40%) for HER; (b) their corresponding Tafel plots.

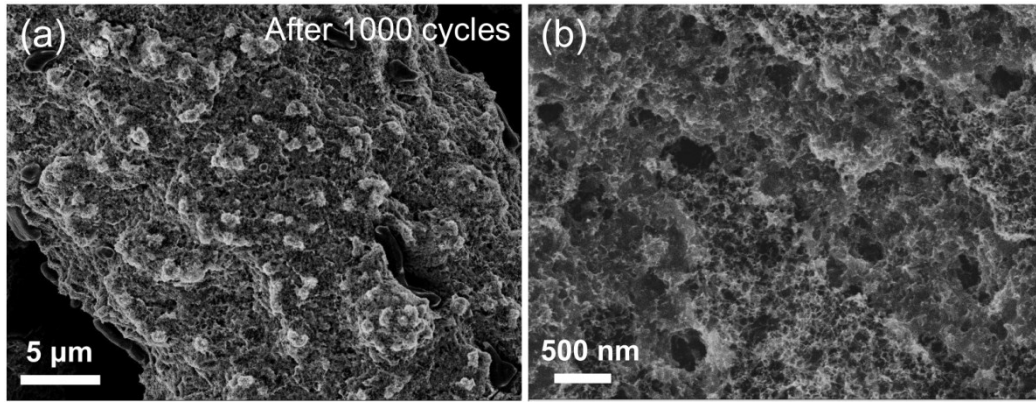

**Figure S8.** (a-b) SEM images of Co:ZnS/CoS<sub>2</sub> (Co:Zn=20%) heterostructure nanowires after the 1000 cycles.



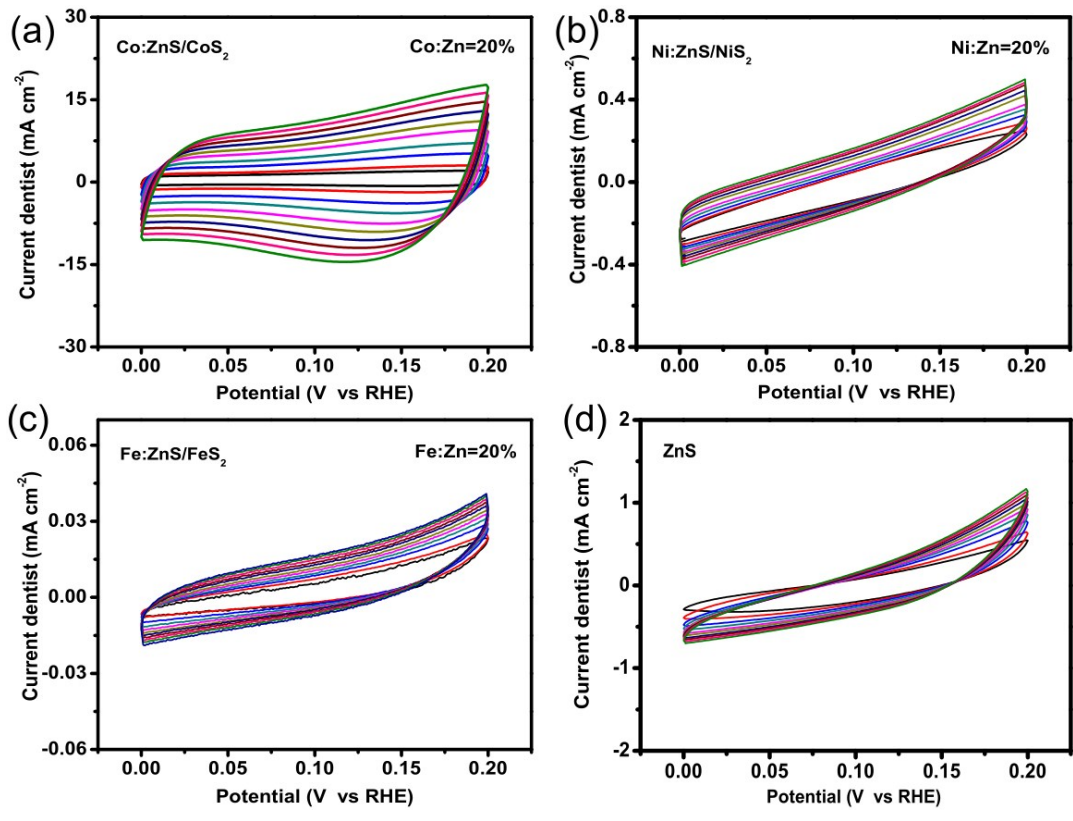

**Figure S9.** (a-d) cyclic voltammograms of Co:ZnS/CoS<sub>2</sub> (Co:Zn=20%), Ni:ZnS/NiS<sub>2</sub> (Ni:Zn=20%), Fe:ZnS/FeS<sub>2</sub> (Fe:Zn=20%), and ZnS were measured in the non-faradaic capacitance current range at scan rates of 5, 10, 20, 30, 40, 50, 60, 70, 80, and 90 mV s<sup>-1</sup>.

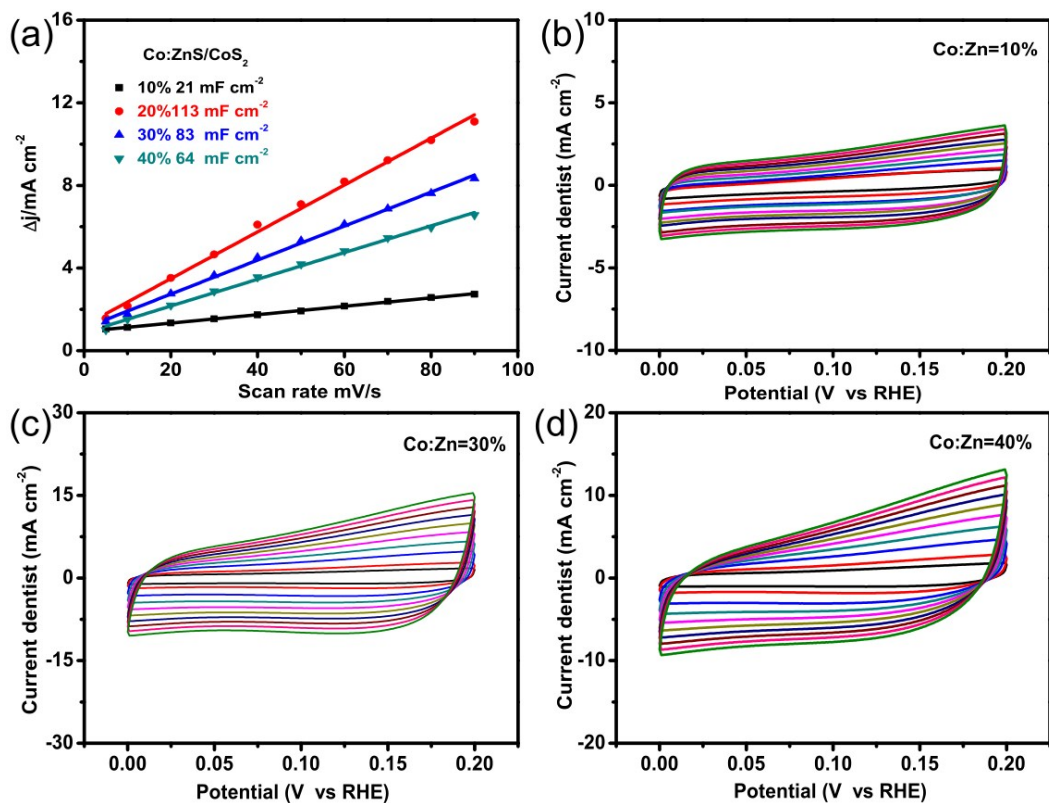

**Figure S10.** (a) The capacitive currents at 0.1V as a function of scan rate for Co:ZnS/CoS<sub>2</sub> (Co:Zn=10%, 20%, 30%, 40%) heterostructure nanowires; (b-d) cyclic voltammograms of Co:ZnS/CoS<sub>2</sub> (Co:Zn=10%, 30%, 40%,) were measured in the non- faradaic capacitance current range at scan rates of 5, 10, 20, 30, 40, 50, 60, 70, 80, and 90  $\text{mV s}^{-1}$ .
